# Supplementary material for: Molecular features of premenopausal breast cancers in Latin American women: Pilot results from the PRECAMA study
Source: PubMed Central journal article supplement (PMC6336331; doi:10.1371/journal.pone.0210372), 2019-01-17

**S2 Fig****A**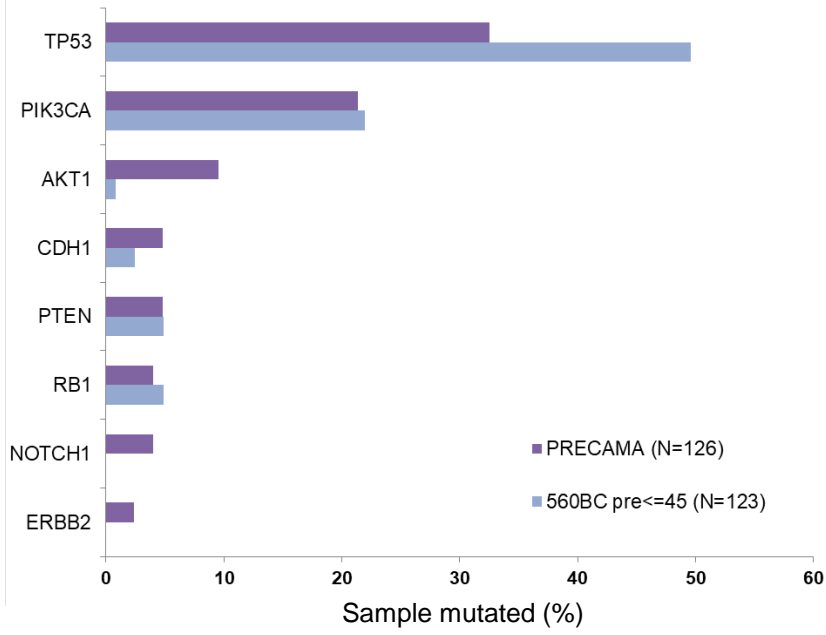**B**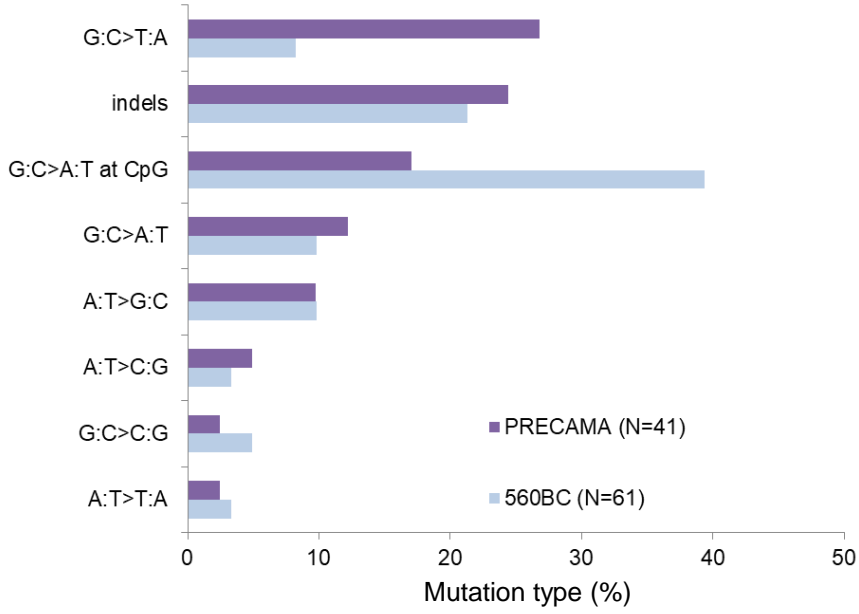**C**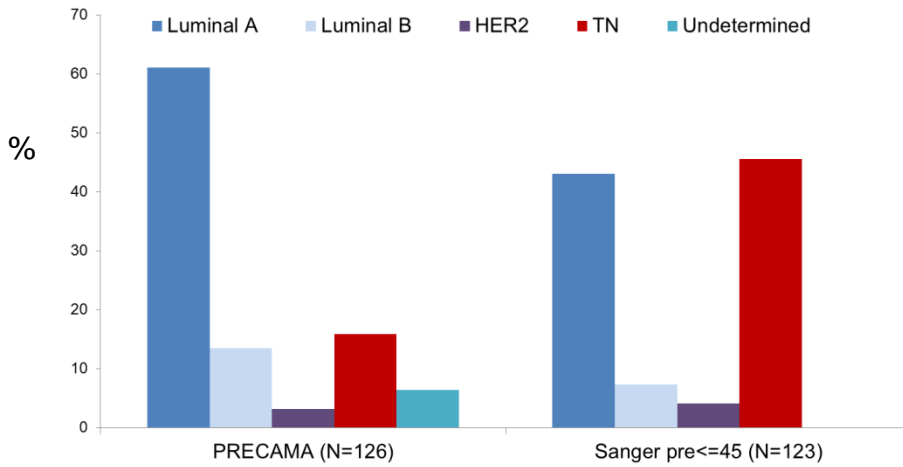

Supplement: pone.0210372.s003.pdf [file pone.0210372.s003.pdf]
